# Supplementary material for: Coverage of primary and booster vaccination against COVID-19 by socioeconomic level: A nationwide cross-sectional registry study
Source: PubMed Central journal article supplement — Hum Vaccin Immunother. 2023 Mar 20;19(1):2188857. doi: 10.1080/21645515.2023.2188857 (PMC10072069; doi:10.1080/21645515.2023.2188857), 2023-03-20
Supplement: KHVI_A_2188857_SM2501.pdf [file KHVI_A_2188857_SM2501.pdf]

|                                    | Age group 18-44 years                          |                                                | Age group >= 45 years                          |                                                |
|------------------------------------|------------------------------------------------|------------------------------------------------|------------------------------------------------|------------------------------------------------|
|                                    | Have received >= 2 doses                       | Have received >= 3 doses                       | Have received >= 2 doses                       | Have received >= 3 doses                       |
|                                    | Adjusted <sup>c</sup> RR [95% CI] <sup>d</sup> |
| <b>Education level<sup>e</sup></b> |                                                |                                                |                                                |                                                |
| < Upper secondary                  | 1.00 (ref. level)                              | 1.00 (ref. level)                              | 1.00 (ref. level)                              | 1.00 (ref. level)                              |
| Upper secondary                    | 1.07 [1.07,1.08]                               | 1.20 [1.19,1.21]                               | 1.01 [1.01,1.01]                               | 1.04 [1.04,1.04]                               |
| University short                   | 1.13 [1.13,1.13]                               | 1.42 [1.41,1.43]                               | 1.02 [1.02,1.02]                               | 1.07 [1.06,1.07]                               |
| University long                    | 1.15 [1.14,1.15]                               | 1.55 [1.54,1.56]                               | 1.02 [1.02,1.02]                               | 1.08 [1.08,1.09]                               |
| Unknown                            | 0.94 [0.94,0.95]                               | 1.00 [0.99,1.02]                               | 0.90 [0.89,0.90]                               | 0.81 [0.80,0.82]                               |
| 18-25 years                        | 1.10 [1.10,1.10]                               | 1.27 [1.26,1.27]                               |                                                |                                                |
| <b>Income decile<sup>f</sup></b>   |                                                |                                                |                                                |                                                |
| 1                                  | 1.00 (ref. level)                              | 1.00 (ref. level)                              | 1.00 (ref. level)                              | 1.00 (ref. level)                              |
| 2                                  | 1.02 [1.02,1.02]                               | 0.92 [0.92,0.93]                               | 1.08 [1.08,1.08]                               | 1.15 [1.14,1.15]                               |
| 3                                  | 1.05 [1.04,1.05]                               | 1.02 [1.02,1.03]                               | 1.11 [1.10,1.11]                               | 1.20 [1.20,1.21]                               |
| 4                                  | 1.07 [1.07,1.07]                               | 1.07 [1.06,1.07]                               | 1.12 [1.12,1.13]                               | 1.24 [1.23,1.24]                               |
| 5                                  | 1.09 [1.08,1.09]                               | 1.11 [1.11,1.12]                               | 1.13 [1.13,1.14]                               | 1.26 [1.25,1.26]                               |
| 6                                  | 1.10 [1.09,1.10]                               | 1.15 [1.14,1.16]                               | 1.14 [1.14,1.14]                               | 1.28 [1.27,1.28]                               |
| 7                                  | 1.10 [1.10,1.10]                               | 1.17 [1.17,1.18]                               | 1.15 [1.14,1.15]                               | 1.29 [1.29,1.30]                               |
| 8                                  | 1.10 [1.10,1.11]                               | 1.18 [1.17,1.19]                               | 1.15 [1.15,1.15]                               | 1.31 [1.30,1.31]                               |
| 9                                  | 1.10 [1.10,1.11]                               | 1.19 [1.19,1.20]                               | 1.16 [1.16,1.16]                               | 1.32 [1.32,1.32]                               |
| 10                                 | 1.10 [1.10,1.10]                               | 1.20 [1.19,1.20]                               | 1.16 [1.16,1.16]                               | 1.32 [1.32,1.33]                               |
| Unknown                            | 1.03 [1.02,1.04]                               | 1.10 [1.08,1.12]                               | 1.01 [0.99,1.02]                               | 1.03 [1.01,1.06]                               |

**Supplementary table 1: Regression analyses<sup>a</sup> for completion of primary vaccination (>=2 doses) and booster vaccination (>=3 doses) against COVID-19<sup>b</sup> by socioeconomic level. *The estimates are not adjusted by confirmed SARS-CoV-2 infection prior to onset of vaccination***

<sup>a</sup> Modified Poisson regression, stratified by age group (18-44 years, >=45 years)

<sup>b</sup> All COVID-19 vaccination by 25 August 2022 among all Norwegian residents aged 18 and older

<sup>c</sup> Estimates adjusted by gender, age, immigrant status, residency in Oslo, medical risk group, and education (for income) and income (for education). See Tables 2 and 3 in main paper for details

<sup>d</sup> RR = relative risk ratio, CI = confidence interval

<sup>e</sup> Highest attained education level

<sup>f</sup> Household income
